# Supplementary material for: CD44 inhibition attenuates EGFR signaling and enhances cisplatin sensitivity in human EGFR wild-type non-small-cell lung cancer cells
Source: PubMed Central journal article supplement — Int J Mol Med. 2020 Apr 1;45(6):1783–92. doi: 10.3892/ijmm.2020.4562 (PMC7169661; doi:10.3892/ijmm.2020.4562), 2020-04-01

Figure S1. Comparison of (A) gene expression of CD44 and (B) 4-day cell growth of blank H460 cells with those transfected with sictrl and siCD44. \* $P < 0.05$  and \*\* $P < 0.01$  vs. sictrl. Si, small interfering; n.s., no statistical significance.

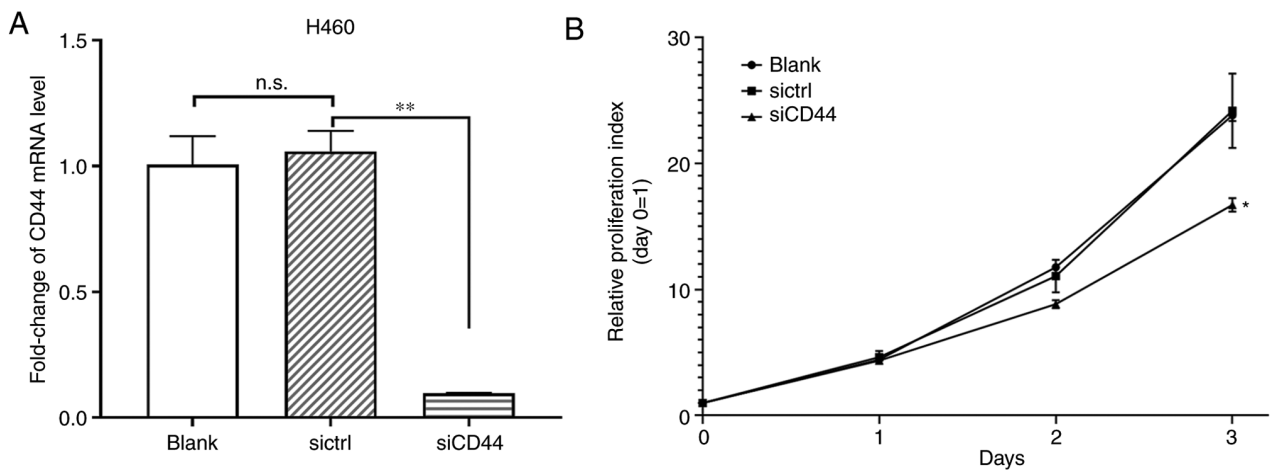

Supplement: Supplementary_Data.pdf [file Supplementary_Data.pdf]
